# Supplementary material for: Multiscale excited state lifetimes of protonated dimethyl aminopyridines
Source: Royal Society of Chemistry journal article supplement (doi:10.1039/c6cp04050k), 2016-01-01
Supplement: c6cp04050k1.pdf [file c6cp04050k1.pdf]

## Electronic Supplementary Information

### Multiscale Excited State Lifetimes in Protonated Dimethylaminopyridines

Satchin Soorkia,<sup>a,b</sup> Michel Broquier<sup>a,b</sup> and Gilles Grégoire<sup>a,b</sup>

<sup>a</sup>Institut des Sciences Moléculaires d'Orsay (ISMO), CNRS, Univ. Paris Sud, Université Paris-Saclay, F-91405 Orsay (France)

<sup>b</sup>Centre Laser de l'Université Paris-Sud (CLUPS/LUMAT), Univ. Paris-Sud, CNRS, IOGS, Université Paris-Saclay, F-91405 Orsay (France)

Corresponding author: [gilles.gregoire@u-psud.fr](mailto:gilles.gregoire@u-psud.fr)

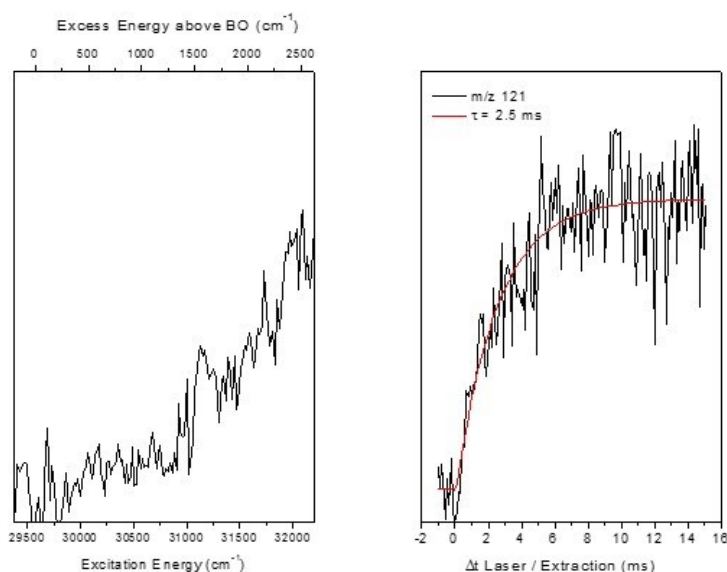

**Fig. SI1.** 1-color excitation spectrum of 2-DMAPH<sup>+</sup> recorded on the m/z 121 fragment. The onset of the fragmentation yield starts about 1500 cm<sup>-1</sup> above the band origin. (Right) Fragmentation kinetics for this fragment fitted with a time constant of  $2.5 \pm 0.2$  ms.

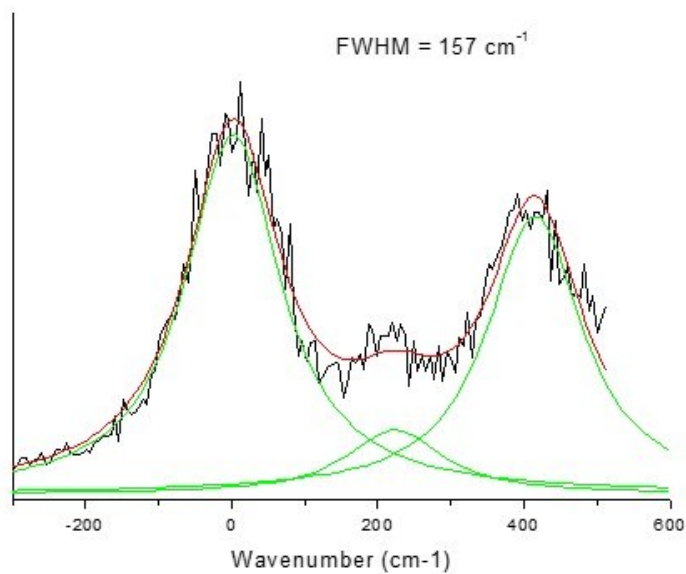

**Fig. SI2.** Low energy part of the electronic spectrum of 4-DMAPH<sup>+</sup> fitted with 3 Lorentzian peaks of same width (157 cm<sup>-1</sup>) centered at 0, 223 and 415 cm<sup>-1</sup>.

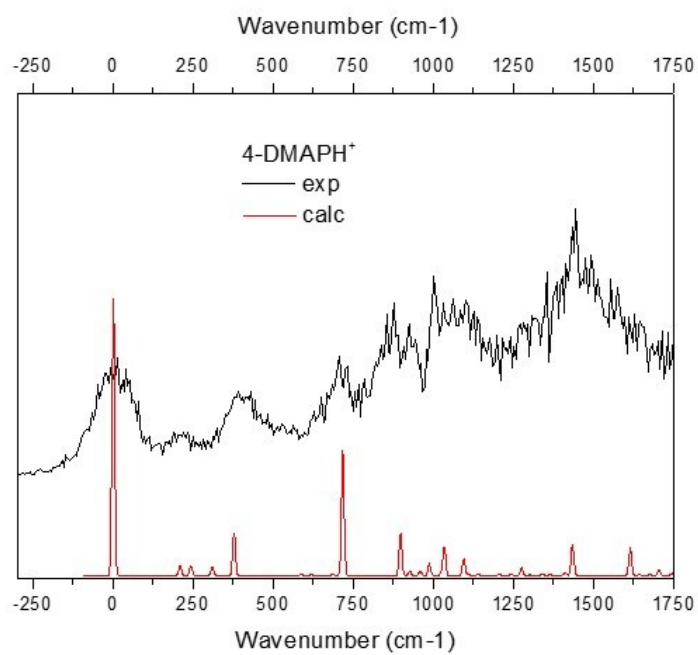

**Fig. SI3.** Comparison of the experimental and simulated Franck-Condon spectra of the  $\pi\pi^*$  ( $A_1$ ) excited state of 4-DMAPH<sup>+</sup>.
